# Supplementary material
Source: publisher figshare collection journal article supplement (https://acs.figshare.com/ndownloader/files/3774571)
Supplement: Supplementary file 1 [file 3774571]

## Sheet: mdio11cnvTable.csv
Table S2. Genomic regions with significantly increased or decreased read coverage identified using paired end NGS data.
Chromosome	Start	End	Coverage	gene1	description1	gene2	description2	gene3	description3	gene4	description4	gene5	description5	gene6	description6	gene7	description7	gene8	description8	gene9	description9	gene10	description10	gene11	description11	gene12	description12	gene13	description13	gene14	description14	gene15	description15	gene16	description16	gene17	description17	gene18	description18	gene19	description19	gene20	description20	gene21	description21	gene22	description22	gene23	description23
Mdio03
Pv_Sal1_chr02	341571	363267	5	PVX_081440	hypothetical protein	PVX_081445	hypothetical protein	PVX_081450	hypothetical protein	PVX_081455	calcium-transporting ATPase	PVX_081460	hypothetical protein
Pv_Sal1_chr08	836532	844097	10
Pv_Sal1_chr08	909695	912174	8
Pv_Sal1_chr10	719845	1211399	2	PVX_080495	RNA binding protein	PVX_080500	hypothetical protein	PVX_080505	hypothetical protein	PVX_080510	hypothetical protein	PVX_080515	ribose 5-phosphate epimerase	PVX_080520	hypothetical protein	PVX_080523	tRNA Phenylalanine	PVX_080525	asparagine-tRNA ligase	PVX_080530	hypothetical protein	PVX_080535	ATP-dependent DNA helicase UvrD	PVX_080540	tubulin tyrosine ligase-like protein 1	PVX_080545	hypothetical protein	PVX_080550	small GTPase Rab1	PVX_080555	hypothetical protein	PVX_080560	deoxyribodipyrimidine photo-lyase	PVX_080565	mitochondrial import inner membrane translocase subunit TIM16	PVX_080570	GTP-binding protein	PVX_080575	purine nucleoside phosphorylase	PVX_080580	hypothetical protein	PVX_080585	hypothetical protein	PVX_080590	hypothetical protein	PVX_080595	hypothetical protein	PVX_080600	hypothetical protein
Pv_Sal1_chr10	1211400	1416940	0	PVX_097530	variable surface protein Vir22	PVX_097540	variable surface protein Vir24-related	PVX_097542	VIR protein	PVX_097545	variable surface protein Vir12-related	PVX_097550	VIR protein	PVX_097555	variable surface protein Vir12	PVX_097557	Plasmodium exported protein	PVX_097560	PST-A protein	PVX_097565	Plasmodium exported protein	PVX_097567	Plasmodium exported protein	PVX_097570	Phist protein	PVX_097575	tryptophan-rich antigen	PVX_097577	tryptophan-rich antigen	PVX_097580	hypothetical protein	PVX_097583	conserved Plasmodium protein	PVX_097585	Plasmodium exported protein	PVX_097590	rhoptry-associated protein 2	PVX_097592	hypothetical protein	PVX_097595	hypothetical protein	PVX_097600	hypothetical protein	PVX_097605	hypothetical protein	PVX_097610	hypothetical protein	PVX_097615	hypothetical protein
Pv_Sal1_chr11	1647565	1681542	4	PVX_113595	T-complex protein 1	PVX_113600	ornithine aminotransferase	PVX_113605	hypothetical protein	PVX_113610	hypothetical protein
Pv_Sal1_chr12	2890269	2998885	0	PVX_118605	hypothetical protein	PVX_118610	hypothetical protein	PVX_118615	hypothetical protein	PVX_118620	proteosome subunit alpha type 1	PVX_118625	hypothetical protein	PVX_118630	hypothetical protein	PVX_118635	hypothetical protein	PVX_118640	hypothetical protein	PVX_118645	cytochrome c oxidase assembly protein COX11	PVX_118648	hypothetical protein	PVX_118650	hypothetical protein	PVX_118655	bromodomain protein	PVX_118660	tubulin	PVX_118665	hypothetical protein	PVX_118670	hypothetical protein	PVX_118675	hypothetical protein	PVX_118680	early transcribed membrane protein	PVX_118682	erythrocyte membrane protein 3	PVX_118685	Plasmodium exported protein	PVX_118690	40 kDa heat shock protein	PVX_118695	Pv-fam-d protein
Pv_Sal1_chr13	1860607	1864814	10
Pv_Sal1_chr14	2194102	2313739	2	PVX_100565	hypothetical protein	PVX_100570	F-box domain containing protein	PVX_100575	hypothetical protein	PVX_100580	hypothetical protein	PVX_100590	hypothetical protein	PVX_100595	hypothetical protein	PVX_100600	elongation factor g	PVX_100610	hypothetical protein	PVX_100620	hypothetical protein	PVX_100625	hypothetical protein	PVX_100630	hypothetical protein	PVX_100635	hypothetical protein	PVX_100640	hypothetical protein	PVX_100645	hypothetical protein	PVX_100650	Ulp1 protease family	PVX_100655	hypothetical protein	PVX_100657	conserved Plasmodium protein	PVX_100660	hypothetical protein	PVX_100665	hypothetical protein	PVX_100670	aspartyl protease	PVX_100675	hypothetical protein	PVX_100680	hypothetical protein	PVX_100685	hypothetical protein
Pv_Sal1_chr14	2898433	3117418	0	PVX_101450	coronin	PVX_101455	thymidylate kinase	PVX_101460	hypothetical protein	PVX_101465	DEAD	PVX_101470	hypothetical protein	PVX_101475	tryptophanyl-tRNA synthetase	PVX_101480	hypothetical protein	PVX_101482	tRNA Valine	PVX_101484	tRNA Glutamic acid	PVX_101485	rhoptry neck protein 3	PVX_101490	hypothetical protein	PVX_101495	reticulocyte binding protein	PVX_101500	hypothetical protein	PVX_101503	VIR protein	PVX_101505	Pv-fam-d protein	PVX_101510	tryptophan-rich antigen	PVX_101515	tryptophan-rich antigen	PVX_101520	Pv-fam-d protein	PVX_101525	tryptophan-rich antigen	PVX_101530	Plasmodium exported protein	PVX_101535	Phist protein	PVX_101540	Pv-fam-d protein	PVX_101545	hypothetical protein
Mdio05
Pv_Sal1_chr01	473919	541139	2	PVX_088170	proteasome subunit alpha type 6	PVX_088175	hypothetical protein	PVX_088180	small GTPase Rab18	PVX_088185	hypothetical protein	PVX_088190	helicase	PVX_088195	hypothetical protein	PVX_088200	hypothetical protein	PVX_088205	vacuolar proton translocating ATPase subunit A	PVX_088210	mitogen-activated protein	PVX_088215	hypothetical protein	PVX_088220	kinesin	PVX_088225	DnaJ domain containing protein	PVX_088230	glycosyltransferase	PVX_088235	ferlin	PVX_088240	hypothetical protein	PVX_088245	hypothetical protein	PVX_088250	AAA family ATPase	PVX_088254	hypothetical protein
Pv_Sal1_chr02	198042	320779	2	PVX_081255	Hemoglobin and proliferation regulated protein HBR1	PVX_081260	transcription initiation factor TFIIB	PVX_081265	chromatin assembly factor 1 protein WD40 domain	PVX_081270	phosphatidylinositol-4-phosphate 5-kinase	PVX_081275	bromodomain protein	PVX_081277	DNA-directed RNA polymerase 2	PVX_081280	FAD-linked sulfhydryl oxidase ERV1	PVX_081285	selenocysteine-specific elongation factor selB homologue	PVX_081290	hypothetical protein	PVX_081295	hypothetical integral membrane protein	PVX_081300	phenylalanyl-tRNA synthetase beta chain	PVX_081305	hypothetical protein	PVX_081307	cold-shock protein	PVX_081310	N-acetyltransferase	PVX_081315	tubulin-specific chaperone a	PVX_081320	elongation of very long chain fatty acids protein 3	PVX_081325	mRNA cleavage factor-like protein	PVX_081330	hypothetical protein	PVX_081335	hypothetical protein	PVX_081340	hypothetical protein	PVX_081345	hypothetical protein	PVX_081350	hypothetical protein	PVX_081355	hypothetical protein
Pv_Sal1_chr03	654174	743370	2	PVX_096135	hypothetical protein	PVX_096140	hypothetical protein	PVX_096145	Rab GTPase activator and protein kinase	PVX_096150	hypothetical protein	PVX_096155	hypothetical protein	PVX_096165	metallo-hydrolase	PVX_096170	hypothetical protein	PVX_096175	dynactin subunit 5	PVX_096180	hypothetical protein	PVX_096185	hypothetical protein	PVX_096195	hypothetical protein	PVX_096200	hypothetical protein	PVX_096205	hypothetical protein	PVX_096210	hypothetical protein	PVX_096215	hypothetical protein	PVX_096220	hypothetical protein	PVX_096225	hypothetical protein	PVX_096230	hypothetical protein	PVX_096235	GTP-binding protein	PVX_096240	hypothetical protein	PVX_096245	hypothetical protein	PVX_096250	PelOta protein homologue	PVX_096252	conserved Plasmodium protein
Pv_Sal1_chr03	743371	992128	0	PVX_000000	Plasmodium exported protein	PVX_000005	Plasmodium exported protein	PVX_000010	Plasmodium exported protein	PVX_000015	Pv-fam-d protein	PVX_000020	variable surface protein Vir9-like	PVX_000025	hypothetical protein	PVX_095990	VIR protein	PVX_095995	variable surface protein Vir16	PVX_095997	VIR protein	PVX_096000	variable surface protein Vir4	PVX_096001	VIR protein	PVX_096001a	VIR protein	PVX_096003	VIR protein	PVX_096004	VIR protein	PVX_096005	variable surface protein Vir15-related	PVX_096007	VIR protein	PVX_096010	Plasmodium exported protein	PVX_096015	Plasmodium exported protein	PVX_096020	Plasmodium exported protein	PVX_096030	hypothetical protein	PVX_096035	hypothetical protein	PVX_096040	hypothetical protein	PVX_096045	hypothetical protein
Pv_Sal1_chr05	410673	412562	5
Pv_Sal1_chr06	136508	281231	2	PVX_001790	hypothetical protein	PVX_001795	hypothetical protein	PVX_001800	hypothetical protein	PVX_001805	hypothetical protein	PVX_001810	hypothetical protein	PVX_001820	hypothetical protein	PVX_001825	hypothetical protein	PVX_001830	hypothetical protein	PVX_001835	60S ribosomal protein L30	PVX_001840	hypothetical protein	PVX_001845	hypothetical protein	PVX_001850	hypothetical protein	PVX_001855	tRNA methyl transferase	PVX_001860	autophagy-related protein 8	PVX_001865	RNA binding protein	PVX_001868	hypothetical protein	PVX_001872	hypothetical protein	PVX_001875	cytoplasmic dynein intermediate chain	PVX_001880	hypothetical protein	PVX_001885	hypothetical protein	PVX_001890	hypothetical protein	PVX_001895	hypothetical protein	PVX_001900	dihydrolipoamide acetyltransferase
Pv_Sal1_chr06	485943	552124	2	PVX_111330	ribosomal protein L3	PVX_111335	centrin	PVX_111340	hypothetical protein	PVX_111345	hypothetical protein	PVX_111350	DNA-directed RNA polymerase II	PVX_111355	merozoite capping protein 1	PVX_111360	hypothetical protein	PVX_111365	U3 small nucleolar ribonucleoprotein protein MPP10	PVX_111370	hypothetical protein	PVX_111375	biotin--	PVX_111380	40S ribosomal protein	PVX_111385	hypothetical protein	PVX_111387	conserved Plasmodium protein	PVX_111390	cell division cycle protein 20 homolog	PVX_111395	hypothetical protein	PVX_111400	hypothetical protein	PVX_111405	hypothetical protein	PVX_111410	hypothetical protein	PVX_111415	conserved Plasmodium protein
Pv_Sal1_chr07	1057429	1058490	4
Pv_Sal1_chr07	1114326	1117272	4	PVX_099915	RNA binding function
Pv_Sal1_chr07	1335989	1497720	0	PVX_005040	hypothetical protein	PVX_005045	variable surface protein Vir12-related	PVX_005050	variable surface protein Vir22	PVX_005055	VIR protein	PVX_005057	VIR protein	PVX_005058	VIR protein	PVX_005060	variable surface protein Vir12-like	PVX_005065	VIR protein	PVX_086845	VIR protein	PVX_086850	variable surface protein Vir35	PVX_086855	variable surface protein Vir24-like	PVX_086860	variable surface protein Vir24-related	PVX_086863	VIR protein	PVX_086865	VIR protein	PVX_086870	VIR protein	PVX_086875	variable surface protein Vir27-related	PVX_086880	variable surface protein Vir23-like	PVX_086890	variable surface protein Vir8-like	PVX_086893	VIR protein	PVX_086895	PV1H1405_P	PVX_086900	Plasmodium exported protein	PVX_086903	Plasmodium exported protein	PVX_086905	Plasmodium exported protein
Pv_Sal1_chr10	935689	1211294	2	PVX_097735	hypothetical protein	PVX_097740	Ser	PVX_097745	actin depolymerizing factor	PVX_097750	protein kinase	PVX_097755	myosin C	PVX_097760	60S ribosomal protein L31	PVX_097765	hypothetical protein	PVX_097770	P-type ATPase	PVX_097772	AN1-like zinc finger family protein	PVX_097775	ATP-dependent helicase	PVX_097780	hypothetical protein	PVX_097785	ATP-dependent helicase	PVX_097787	conserved Plasmodium protein	PVX_097790	3-methyl-2-oxobutanoate dehydrogenase	PVX_097795	hypothetical protein	PVX_097800	hypothetical protein	PVX_097805	hypothetical protein	PVX_097810	hypothetical protein	PVX_097815	hypothetical protein	PVX_097820	actin-related protein	PVX_097825	hypothetical protein	PVX_097830	hypothetical protein	PVX_097835	DNA repair protein
Pv_Sal1_chr10	1211295	1416940	0	PVX_097530	variable surface protein Vir22	PVX_097540	variable surface protein Vir24-related	PVX_097542	VIR protein	PVX_097545	variable surface protein Vir12-related	PVX_097550	VIR protein	PVX_097555	variable surface protein Vir12	PVX_097557	Plasmodium exported protein	PVX_097560	PST-A protein	PVX_097565	Plasmodium exported protein	PVX_097567	Plasmodium exported protein	PVX_097570	Phist protein	PVX_097575	tryptophan-rich antigen	PVX_097577	tryptophan-rich antigen	PVX_097580	hypothetical protein	PVX_097583	conserved Plasmodium protein	PVX_097585	Plasmodium exported protein	PVX_097590	rhoptry-associated protein 2	PVX_097592	hypothetical protein	PVX_097595	hypothetical protein	PVX_097600	hypothetical protein	PVX_097605	hypothetical protein	PVX_097610	hypothetical protein	PVX_097615	hypothetical protein
Pv_Sal1_chr12	1062676	1194930	2	PVX_116550	hypothetical protein	PVX_116555	hypothetical protein	PVX_116557	translation initiation factor EIF-2B gamma subunit	PVX_116560	splicing factor	PVX_116565	hypothetical protein	PVX_116570	TBC domain containing protein	PVX_116575	WD domain	PVX_116580	hypothetical protein	PVX_116582	conserved Plasmodium protein	PVX_116585	hypothetical protein	PVX_116590	hypothetical protein	PVX_116595	hypothetical protein	PVX_116600	Tetratricopeptide repeat protein 11	PVX_116603	hypothetical protein	PVX_116604	hypothetical protein	PVX_116610	hypothetical protein	PVX_116615	lactate	PVX_116620	phosphoribosylpyrophosphate synthetase	PVX_116625	U6 snRNA-associated Sm-like protein LSm6	PVX_116630	lactate dehydrogenase	PVX_116635	dihydrofolate synthase	PVX_116640	VAMP-like protein YKT62	PVX_116645	hypothetical protein
Pv_Sal1_chr12	2890266	2998885	0	PVX_118605	hypothetical protein	PVX_118610	hypothetical protein	PVX_118615	hypothetical protein	PVX_118620	proteosome subunit alpha type 1	PVX_118625	hypothetical protein	PVX_118630	hypothetical protein	PVX_118635	hypothetical protein	PVX_118640	hypothetical protein	PVX_118645	cytochrome c oxidase assembly protein COX11	PVX_118648	hypothetical protein	PVX_118650	hypothetical protein	PVX_118655	bromodomain protein	PVX_118660	tubulin	PVX_118665	hypothetical protein	PVX_118670	hypothetical protein	PVX_118675	hypothetical protein	PVX_118680	early transcribed membrane protein	PVX_118682	erythrocyte membrane protein 3	PVX_118685	Plasmodium exported protein	PVX_118690	40 kDa heat shock protein	PVX_118695	Pv-fam-d protein
Pv_Sal1_chr13	1086464	1169199	2	PVX_085310	hypothetical protein	PVX_085315	PP1-like protein serine	PVX_085320	cyclophilin	PVX_085325	hypothetical protein	PVX_085330	GTPase	PVX_085335	14-3-3 protein	PVX_085340	actin	PVX_085345	hypothetcial protein	PVX_085350	hypothetical protein	PVX_085355	ERAD-associated E3 ubiquitin-protein ligase HRD1	PVX_085360	hypothetical protein	PVX_085365	DnaJ domain containing protein	PVX_085370	hypothetical protein	PVX_085375	hypothetical protein	PVX_085380	hypothetical protein	PVX_085385	Ctr copper transporter domain containing protein	PVX_085390	hypothetical protein	PVX_085395	hypothetical protein	PVX_085405	mitochondrial import inner membrane translocase subunit TIM8	PVX_085410	DNA-directed RNA polymerases III 39 kDa polypeptide	PVX_085415	hypothetical protein	PVX_085420	40S ribosomal protein S25	PVX_085425	hypothetical protein
Pv_Sal1_chr14	1855428	2085297	2	PVX_123870	hypothetical protein	PVX_123875	pre-mRNA branch site protein p14	PVX_123880	hypothetical protein	PVX_123885	isoleucyl-tRNA synthetase	PVX_123890	hypothetical protein	PVX_123895	hypothetical protein	PVX_123900	hypothetical protein	PVX_123905	hypothetical protein	PVX_123910	hypothetical protein	PVX_123915	hypothetical protein	PVX_123920	ubiquitin-activating enzyme e1	PVX_123925	hypothetical protein	PVX_123930	hypothetical protein	PVX_123935	hydrolase	PVX_123940	hypothetical protein	PVX_123945	hydrolase	PVX_123950	hypothetical protein	PVX_123955	hypothetical protein	PVX_123960	proliferating cell nuclear antigen	PVX_123965	WD domain	PVX_123970	ataxin-3	PVX_123975	hypothetical protein	PVX_123980	hypothetical protein
Pv_Sal1_chr14	2174995	2226650	2	PVX_100540	hypothetical protein	PVX_100545	phenylalanyl-tRNA synthetase alpha chain	PVX_100550	chaperonin CPN60	PVX_100555	dihydrolipoamide dehydrogenase family protein	PVX_100560	cytochrome b5	PVX_100565	hypothetical protein	PVX_100570	F-box domain containing protein	PVX_100575	hypothetical protein	PVX_100580	hypothetical protein	PVX_100590	hypothetical protein	PVX_100595	hypothetical protein	PVX_100600	elongation factor g	PVX_100610	hypothetical protein	PVX_100620	hypothetical protein
Mdio06
Pv_Sal1_chr02	263548	320769	2	PVX_081350	hypothetical protein	PVX_081355	hypothetical protein	PVX_081360	hypothetical protein	PVX_081365	hypothetical protein	PVX_081370	hypothetical protein	PVX_081375	20S proteasome subunit beta-3	PVX_081380	hypothetical protein	PVX_081385	DNA repair exonuclease	PVX_081390	hypothetical protein	PVX_081395	serine
Pv_Sal1_chr03	450161	461675	2	PVX_000580	hypothetical protein	PVX_000585	transporter
Pv_Sal1_chr03	573690	714872	2	PVX_096165	metallo-hydrolase	PVX_096170	hypothetical protein	PVX_096175	dynactin subunit 5	PVX_096180	hypothetical protein	PVX_096185	hypothetical protein	PVX_096195	hypothetical protein	PVX_096200	hypothetical protein	PVX_096205	hypothetical protein	PVX_096210	hypothetical protein	PVX_096215	hypothetical protein	PVX_096220	hypothetical protein	PVX_096225	hypothetical protein	PVX_096230	hypothetical protein	PVX_096235	GTP-binding protein	PVX_096240	hypothetical protein	PVX_096245	hypothetical protein	PVX_096250	PelOta protein homologue	PVX_096252	conserved Plasmodium protein	PVX_096253	conserved Plasmodium protein	PVX_096255	hypothetical protein	PVX_096260	hypothetical protein	PVX_096265	40S ribosomal protein S5	PVX_096268	conserved Plasmodium membrane protein
Pv_Sal1_chr03	714873	992128	0	PVX_000000	Plasmodium exported protein	PVX_000005	Plasmodium exported protein	PVX_000010	Plasmodium exported protein	PVX_000015	Pv-fam-d protein	PVX_000020	variable surface protein Vir9-like	PVX_000025	hypothetical protein	PVX_095990	VIR protein	PVX_095995	variable surface protein Vir16	PVX_095997	VIR protein	PVX_096000	variable surface protein Vir4	PVX_096001	VIR protein	PVX_096001a	VIR protein	PVX_096003	VIR protein	PVX_096004	VIR protein	PVX_096005	variable surface protein Vir15-related	PVX_096007	VIR protein	PVX_096010	Plasmodium exported protein	PVX_096015	Plasmodium exported protein	PVX_096020	Plasmodium exported protein	PVX_096030	hypothetical protein	PVX_096035	hypothetical protein	PVX_096040	hypothetical protein	PVX_096045	hypothetical protein
Pv_Sal1_chr05	410720	412457	4
Pv_Sal1_chr05	777017	788775	2
Pv_Sal1_chr05	990106	995074	4
Pv_Sal1_chr06	486027	552091	2	PVX_111330	ribosomal protein L3	PVX_111335	centrin	PVX_111340	hypothetical protein	PVX_111345	hypothetical protein	PVX_111350	DNA-directed RNA polymerase II	PVX_111355	merozoite capping protein 1	PVX_111360	hypothetical protein	PVX_111365	U3 small nucleolar ribonucleoprotein protein MPP10	PVX_111370	hypothetical protein	PVX_111375	biotin--	PVX_111380	40S ribosomal protein	PVX_111385	hypothetical protein	PVX_111387	conserved Plasmodium protein	PVX_111390	cell division cycle protein 20 homolog	PVX_111395	hypothetical protein	PVX_111400	hypothetical protein	PVX_111405	hypothetical protein	PVX_111410	hypothetical protein	PVX_111415	conserved Plasmodium protein
Pv_Sal1_chr07	1338390	1497720	0	PVX_005040	hypothetical protein	PVX_005045	variable surface protein Vir12-related	PVX_005050	variable surface protein Vir22	PVX_005055	VIR protein	PVX_005057	VIR protein	PVX_005058	VIR protein	PVX_005060	variable surface protein Vir12-like	PVX_005065	VIR protein	PVX_086845	VIR protein	PVX_086850	variable surface protein Vir35	PVX_086855	variable surface protein Vir24-like	PVX_086860	variable surface protein Vir24-related	PVX_086863	VIR protein	PVX_086865	VIR protein	PVX_086870	VIR protein	PVX_086875	variable surface protein Vir27-related	PVX_086880	variable surface protein Vir23-like	PVX_086890	variable surface protein Vir8-like	PVX_086893	VIR protein	PVX_086895	PV1H1405_P	PVX_086900	Plasmodium exported protein	PVX_086903	Plasmodium exported protein	PVX_086905	Plasmodium exported protein
Pv_Sal1_chr08	974279	975832	5
Pv_Sal1_chr08	1208062	1223442	2	PVX_119755	hypothetical protein	PVX_119760	hypothetical protein	PVX_119765	hypothetical protein	PVX_119770	hypothetical protein	PVX_119775	hypothetical protein
Pv_Sal1_chr08	1375443	1380989	4	PVX_119565	dual-specificity protein phosphatase	PVX_119570	hypothetical protein
Pv_Sal1_chr10	761897	804976	2	PVX_080560	deoxyribodipyrimidine photo-lyase	PVX_080565	mitochondrial import inner membrane translocase subunit TIM16	PVX_080570	GTP-binding protein	PVX_080575	purine nucleoside phosphorylase	PVX_080580	hypothetical protein	PVX_080585	hypothetical protein	PVX_080590	hypothetical protein	PVX_080595	hypothetical protein	PVX_080600	hypothetical protein	PVX_080605	orotate phosphoribosyltransferase	PVX_080610	small GTPase Rab1A	PVX_080615	hypothetical protein
Pv_Sal1_chr12	1062718	1194989	2	PVX_116550	hypothetical protein	PVX_116555	hypothetical protein	PVX_116557	translation initiation factor EIF-2B gamma subunit	PVX_116560	splicing factor	PVX_116565	hypothetical protein	PVX_116570	TBC domain containing protein	PVX_116575	WD domain	PVX_116580	hypothetical protein	PVX_116582	conserved Plasmodium protein	PVX_116585	hypothetical protein	PVX_116590	hypothetical protein	PVX_116595	hypothetical protein	PVX_116600	Tetratricopeptide repeat protein 11	PVX_116603	hypothetical protein	PVX_116604	hypothetical protein	PVX_116610	hypothetical protein	PVX_116615	lactate	PVX_116620	phosphoribosylpyrophosphate synthetase	PVX_116625	U6 snRNA-associated Sm-like protein LSm6	PVX_116630	lactate dehydrogenase	PVX_116635	dihydrofolate synthase	PVX_116640	VAMP-like protein YKT62	PVX_116645	hypothetical protein
Pv_Sal1_chr12	2890006	2998885	0	PVX_118605	hypothetical protein	PVX_118610	hypothetical protein	PVX_118615	hypothetical protein	PVX_118620	proteosome subunit alpha type 1	PVX_118625	hypothetical protein	PVX_118630	hypothetical protein	PVX_118635	hypothetical protein	PVX_118640	hypothetical protein	PVX_118645	cytochrome c oxidase assembly protein COX11	PVX_118648	hypothetical protein	PVX_118650	hypothetical protein	PVX_118655	bromodomain protein	PVX_118660	tubulin	PVX_118665	hypothetical protein	PVX_118670	hypothetical protein	PVX_118675	hypothetical protein	PVX_118680	early transcribed membrane protein	PVX_118682	erythrocyte membrane protein 3	PVX_118685	Plasmodium exported protein	PVX_118690	40 kDa heat shock protein	PVX_118695	Pv-fam-d protein
Pv_Sal1_chr13	1023623	1232278	2	PVX_085225	ribosomal protein L21e	PVX_085230	hypothetical protein	PVX_085235	hypothetical protein	PVX_085240	hypothetical protein	PVX_085245	hypothetical protein	PVX_085250	hypothetical protein	PVX_085255	DNA-directed DNA polymerase	PVX_085260	hypothetical protein	PVX_085265	enoyl-CoA hydratase	PVX_085270	ribosomal protein L7A	PVX_085275	60S ribosomal protein family L5	PVX_085290	hypothetical protein	PVX_085295	hypothetical protein	PVX_085300	calcium-dependent protein kinase	PVX_085305	hypothetical protein	PVX_085310	hypothetical protein	PVX_085315	PP1-like protein serine	PVX_085320	cyclophilin	PVX_085325	hypothetical protein	PVX_085330	GTPase	PVX_085335	14-3-3 protein	PVX_085340	actin	PVX_085345	hypothetcial protein
Pv_Sal1_chr14	1750489	1757180	5
Pv_Sal1_chr14	1861533	1895385	2	PVX_123880	hypothetical protein	PVX_123885	isoleucyl-tRNA synthetase	PVX_123890	hypothetical protein	PVX_123895	hypothetical protein	PVX_123900	hypothetical protein	PVX_123905	hypothetical protein	PVX_123910	hypothetical protein	PVX_123915	hypothetical protein
Pv_Sal1_chr14	1911436	2104831	2	PVX_123945	hydrolase	PVX_123950	hypothetical protein	PVX_123955	hypothetical protein	PVX_123960	proliferating cell nuclear antigen	PVX_123965	WD domain	PVX_123970	ataxin-3	PVX_123975	hypothetical protein	PVX_123980	hypothetical protein	PVX_123985	ATP-dependent RNA helicase	PVX_123990	hypothetical protein	PVX_123995	hypothetical protein	PVX_124000	hypothetical protein	PVX_124005	hypothetical protein	PVX_124010	hypothetical protein	PVX_124015	hypothetical protein	PVX_124020	histone acetyltransferase	PVX_124025	RNA pseudouridylate synthase	PVX_124030	hypothetical protein	PVX_124035	hypothetical protein	PVX_124040	hypothetical protein	PVX_124045	NIMA-related protein kinase	PVX_124050	hypothetical protein	PVX_124055	hypothetical protein
Pv_Sal1_chr14	2175024	2226605	3	PVX_100540	hypothetical protein	PVX_100545	phenylalanyl-tRNA synthetase alpha chain	PVX_100550	chaperonin CPN60	PVX_100555	dihydrolipoamide dehydrogenase family protein	PVX_100560	cytochrome b5	PVX_100565	hypothetical protein	PVX_100570	F-box domain containing protein	PVX_100575	hypothetical protein	PVX_100580	hypothetical protein	PVX_100590	hypothetical protein	PVX_100595	hypothetical protein	PVX_100600	elongation factor g	PVX_100610	hypothetical protein	PVX_100620	hypothetical protein
Mdio08
Pv_Sal1_chr02	263468	310108	2	PVX_081350	hypothetical protein	PVX_081355	hypothetical protein	PVX_081360	hypothetical protein	PVX_081365	hypothetical protein	PVX_081370	hypothetical protein	PVX_081375	20S proteasome subunit beta-3	PVX_081380	hypothetical protein	PVX_081385	DNA repair exonuclease	PVX_081390	hypothetical protein
Pv_Sal1_chr03	450101	712834	2	PVX_000525	protein kinase domain containing protein	PVX_000530	hypothetical protein	PVX_000535	thioredoxin	PVX_000540	hypothetical protein	PVX_000545	seryl-tRNA synthetase	PVX_000550	hypothetical protein	PVX_000555	calcium-dependent protein kinase 4	PVX_000560	queuine tRNA-ribosyltransferase	PVX_000565	hypothetical protein	PVX_000570	hypothetical protein	PVX_000575	hypothetical protein	PVX_000580	hypothetical protein	PVX_000585	transporter	PVX_096165	metallo-hydrolase	PVX_096170	hypothetical protein	PVX_096175	dynactin subunit 5	PVX_096180	hypothetical protein	PVX_096185	hypothetical protein	PVX_096195	hypothetical protein	PVX_096200	hypothetical protein	PVX_096205	hypothetical protein	PVX_096210	hypothetical protein	PVX_096215	hypothetical protein
Pv_Sal1_chr05	266348	268867	4
Pv_Sal1_chr05	958110	1023432	2	PVX_089945	RNA-binding protein of pumilio	PVX_089950	bifunctional dihydrofolate reductase-thymidylate synthase 1	PVX_089955	hypothetical protein	PVX_089960	hypothetical protein	PVX_089970	hypothetical protein	PVX_089972	conserved Plasmodium protein	PVX_089975	hypothetical protein	PVX_089980	cdc2-related protein kinase 1	PVX_089985	hypothetical protein	PVX_089990	hypothetical protein
Pv_Sal1_chr09	1286021	1287857	8
Pv_Sal1_chr11	1647545	1834647	2	PVX_113400	glyoxalase I	PVX_113405	hypothetical protein	PVX_113410	hypothetical protein	PVX_113415	50S ribosomal protein L24	PVX_113420	RNA binding protein	PVX_113430	hypothetical protein	PVX_113435	serine	PVX_113440	calcium-binding protein	PVX_113445	cyclin dependent kinase binding protein	PVX_113450	nucleoside diphosphate kinase	PVX_113455	hypothetical protein	PVX_113460	hypothetical protein	PVX_113465	long chain polyunsaturated fatty acid elongation enzyme	PVX_113470	hypothetical protein	PVX_113475	RNA binding protein	PVX_113480	ubiquitin-conjugating enzyme E2 I	PVX_113485	hypothetical protein	PVX_113490	hypothetical protein	PVX_113495	polypyrimidine tract binding protein	PVX_113500	hypothetical protein	PVX_113505	coatomer alpha subunit	PVX_113510	glutaredoxin-like protein	PVX_113515	translation initiation factor IF-2
Pv_Sal1_chr12	137510	142332	5
Pv_Sal1_chr12	2890261	2998885	0	PVX_118605	hypothetical protein	PVX_118610	hypothetical protein	PVX_118615	hypothetical protein	PVX_118620	proteosome subunit alpha type 1	PVX_118625	hypothetical protein	PVX_118630	hypothetical protein	PVX_118635	hypothetical protein	PVX_118640	hypothetical protein	PVX_118645	cytochrome c oxidase assembly protein COX11	PVX_118648	hypothetical protein	PVX_118650	hypothetical protein	PVX_118655	bromodomain protein	PVX_118660	tubulin	PVX_118665	hypothetical protein	PVX_118670	hypothetical protein	PVX_118675	hypothetical protein	PVX_118680	early transcribed membrane protein	PVX_118682	erythrocyte membrane protein 3	PVX_118685	Plasmodium exported protein	PVX_118690	40 kDa heat shock protein	PVX_118695	Pv-fam-d protein
Pv_Sal1_chr13	1100200	1169238	2	PVX_085320	cyclophilin	PVX_085325	hypothetical protein	PVX_085330	GTPase	PVX_085335	14-3-3 protein	PVX_085340	actin	PVX_085345	hypothetcial protein	PVX_085350	hypothetical protein	PVX_085355	ERAD-associated E3 ubiquitin-protein ligase HRD1	PVX_085360	hypothetical protein	PVX_085365	DnaJ domain containing protein	PVX_085370	hypothetical protein	PVX_085375	hypothetical protein	PVX_085380	hypothetical protein	PVX_085385	Ctr copper transporter domain containing protein	PVX_085390	hypothetical protein	PVX_085395	hypothetical protein	PVX_085405	mitochondrial import inner membrane translocase subunit TIM8	PVX_085410	DNA-directed RNA polymerases III 39 kDa polypeptide	PVX_085415	hypothetical protein	PVX_085420	40S ribosomal protein S25	PVX_085425	hypothetical protein	PVX_085430	hypothetical protein
Pv_Sal1_chr14	1853407	1876849	2	PVX_123865	hypothetical protein	PVX_123870	hypothetical protein	PVX_123875	pre-mRNA branch site protein p14	PVX_123880	hypothetical protein	PVX_123885	isoleucyl-tRNA synthetase
Pv_Sal1_chr14	1910605	1916697	3	PVX_123940	hypothetical protein
Pv_Sal1_chr14	2017849	2072460	2	PVX_124070	WD domain	PVX_124075	hypothetical protein	PVX_124080	hypothetical protein	PVX_124085	multidrug resistance associated protein	PVX_124090	hypothetical protein	PVX_124095	macrophage migration inhibitory factor	PVX_124100	T-complex protein 1	PVX_124105	hypothetical protein	PVX_124110	hypothetical protein	PVX_124115	hypothetical protein
Mdio10
Pv_Sal1_chr01	473765	540893	2	PVX_088170	proteasome subunit alpha type 6	PVX_088175	hypothetical protein	PVX_088180	small GTPase Rab18	PVX_088185	hypothetical protein	PVX_088190	helicase	PVX_088195	hypothetical protein	PVX_088200	hypothetical protein	PVX_088205	vacuolar proton translocating ATPase subunit A	PVX_088210	mitogen-activated protein	PVX_088215	hypothetical protein	PVX_088220	kinesin	PVX_088225	DnaJ domain containing protein	PVX_088230	glycosyltransferase	PVX_088235	ferlin	PVX_088240	hypothetical protein	PVX_088245	hypothetical protein	PVX_088250	AAA family ATPase	PVX_088254	hypothetical protein
Pv_Sal1_chr02	263456	320821	2	PVX_081350	hypothetical protein	PVX_081355	hypothetical protein	PVX_081360	hypothetical protein	PVX_081365	hypothetical protein	PVX_081370	hypothetical protein	PVX_081375	20S proteasome subunit beta-3	PVX_081380	hypothetical protein	PVX_081385	DNA repair exonuclease	PVX_081390	hypothetical protein	PVX_081395	serine
Pv_Sal1_chr03	667765	715183	2	PVX_096165	metallo-hydrolase	PVX_096170	hypothetical protein	PVX_096175	dynactin subunit 5	PVX_096180	hypothetical protein	PVX_096185	hypothetical protein	PVX_096195	hypothetical protein	PVX_096200	hypothetical protein	PVX_096205	hypothetical protein	PVX_096210	hypothetical protein	PVX_096215	hypothetical protein	PVX_096220	hypothetical protein	PVX_096225	hypothetical protein	PVX_096230	hypothetical protein	PVX_096235	GTP-binding protein	PVX_096240	hypothetical protein	PVX_096245	hypothetical protein
Pv_Sal1_chr03	715184	992128	0	PVX_000000	Plasmodium exported protein	PVX_000005	Plasmodium exported protein	PVX_000010	Plasmodium exported protein	PVX_000015	Pv-fam-d protein	PVX_000020	variable surface protein Vir9-like	PVX_000025	hypothetical protein	PVX_095990	VIR protein	PVX_095995	variable surface protein Vir16	PVX_095997	VIR protein	PVX_096000	variable surface protein Vir4	PVX_096001	VIR protein	PVX_096001a	VIR protein	PVX_096003	VIR protein	PVX_096004	VIR protein	PVX_096005	variable surface protein Vir15-related	PVX_096007	VIR protein	PVX_096010	Plasmodium exported protein	PVX_096015	Plasmodium exported protein	PVX_096020	Plasmodium exported protein	PVX_096030	hypothetical protein	PVX_096035	hypothetical protein	PVX_096040	hypothetical protein	PVX_096045	hypothetical protein
Pv_Sal1_chr05	777034	788812	2
Pv_Sal1_chr06	460202	538234	2	PVX_111360	hypothetical protein	PVX_111365	U3 small nucleolar ribonucleoprotein protein MPP10	PVX_111370	hypothetical protein	PVX_111375	biotin B acetyl-CoA-carboxylase synthetase	PVX_111380	40S ribosomal protein	PVX_111385	hypothetical protein	PVX_111387	conserved Plasmodium protein	PVX_111390	cell division cycle protein 20 homolog	PVX_111395	hypothetical protein	PVX_111400	hypothetical protein	PVX_111405	hypothetical protein	PVX_111410	hypothetical protein	PVX_111415	conserved Plasmodium protein	PVX_111420	hypothetical protein	PVX_111425	hypothetical protein	PVX_111430	cytochrome c oxidase copper chaperone	PVX_111435	hypothetical protein
Pv_Sal1_chr08	1056881	1060434	2
Pv_Sal1_chr11	1105157	1109674	2
Pv_Sal1_chr11	1383926	1462141	2	PVX_113835	thiamin-phosphate pyrophosphorylase	PVX_113844	hypothetical protein	PVX_113846	hypothetical protein	PVX_113850	transporter	PVX_113855	hypothetical protein	PVX_113860	60S ribosomal protein L19	PVX_113865	hypothetical protein	PVX_113870	hypothetical protein	PVX_113875	endonuclease III homologue	PVX_113880	hypothetical protein	PVX_113885	hypothetical protein	PVX_113890	enoyl-acyl carrier protein reductase	PVX_113895	hypothetical protein	PVX_113900	GPI-anchored wall transfer protein 1	PVX_113905	hypothetical protein	PVX_113910	cdc2-like protein kinase	PVX_113915	hypothetical protein	PVX_113920	RNA binding function
Pv_Sal1_chr11	1636237	1647502	3	PVX_113615	transporter protein	PVX_113617	citrate synthase-like protein	PVX_113620	hypothetical protein
Pv_Sal1_chr12	1062564	1195004	2	PVX_116550	hypothetical protein	PVX_116555	hypothetical protein	PVX_116557	translation initiation factor EIF-2B gamma subunit	PVX_116560	splicing factor	PVX_116565	hypothetical protein	PVX_116570	TBC domain containing protein	PVX_116575	WD domain	PVX_116580	hypothetical protein	PVX_116582	conserved Plasmodium protein	PVX_116585	hypothetical protein	PVX_116590	hypothetical protein	PVX_116595	hypothetical protein	PVX_116600	Tetratricopeptide repeat protein 11	PVX_116603	hypothetical protein	PVX_116604	hypothetical protein	PVX_116610	hypothetical protein	PVX_116615	lactate	PVX_116620	phosphoribosylpyrophosphate synthetase	PVX_116625	U6 snRNA-associated Sm-like protein LSm6	PVX_116630	lactate dehydrogenase	PVX_116635	dihydrofolate synthase	PVX_116640	VAMP-like protein YKT62	PVX_116645	hypothetical protein
Pv_Sal1_chr12	2409531	2410660	5
Pv_Sal1_chr13	792440	821420	2	PVX_084940	hypothetical protein	PVX_084945	syntaxin	PVX_084950	hypothetical protein	PVX_084955	60S ribosomal protein L14	PVX_084960	ATP-specific succinyl-CoA synthetase beta subunit	PVX_084965	mitogen-activated protein kinase 1	PVX_084970	hypothetical protein
Pv_Sal1_chr13	1091303	1169213	2	PVX_085315	PP1-like protein serine	PVX_085320	cyclophilin	PVX_085325	hypothetical protein	PVX_085330	GTPase	PVX_085335	14-3-3 protein	PVX_085340	actin	PVX_085345	hypothetcial protein	PVX_085350	hypothetical protein	PVX_085355	ERAD-associated E3 ubiquitin-protein ligase HRD1	PVX_085360	hypothetical protein	PVX_085365	DnaJ domain containing protein	PVX_085370	hypothetical protein	PVX_085375	hypothetical protein	PVX_085380	hypothetical protein	PVX_085385	Ctr copper transporter domain containing protein	PVX_085390	hypothetical protein	PVX_085395	hypothetical protein	PVX_085405	mitochondrial import inner membrane translocase subunit TIM8	PVX_085410	DNA-directed RNA polymerases III 39 kDa polypeptide	PVX_085415	hypothetical protein	PVX_085420	40S ribosomal protein S25	PVX_085425	hypothetical protein	PVX_085430	hypothetical protein
Pv_Sal1_chr12	2890006	2998885	0	PVX_118605	hypothetical protein	PVX_118610	hypothetical protein	PVX_118615	hypothetical protein	PVX_118620	proteosome subunit alpha type 1	PVX_118625	hypothetical protein	PVX_118630	hypothetical protein	PVX_118635	hypothetical protein	PVX_118640	hypothetical protein	PVX_118645	cytochrome c oxidase assembly protein COX11	PVX_118648	hypothetical protein	PVX_118650	hypothetical protein	PVX_118655	bromodomain protein	PVX_118660	tubulin	PVX_118665	hypothetical protein	PVX_118670	hypothetical protein	PVX_118675	hypothetical protein	PVX_118680	early transcribed membrane protein	PVX_118682	erythrocyte membrane protein 3	PVX_118685	Plasmodium exported protein	PVX_118690	40 kDa heat shock protein	PVX_118695	Pv-fam-d protein
Mdio11
Pv_Sal1_chr03	576556	713624	2	PVX_096165	metallo-hydrolase	PVX_096170	hypothetical protein	PVX_096175	dynactin subunit 5	PVX_096180	hypothetical protein	PVX_096185	hypothetical protein	PVX_096195	hypothetical protein	PVX_096200	hypothetical protein	PVX_096205	hypothetical protein	PVX_096210	hypothetical protein	PVX_096215	hypothetical protein	PVX_096220	hypothetical protein	PVX_096225	hypothetical protein	PVX_096230	hypothetical protein	PVX_096235	GTP-binding protein	PVX_096240	hypothetical protein	PVX_096245	hypothetical protein	PVX_096250	PelOta protein homologue	PVX_096252	conserved Plasmodium protein	PVX_096253	conserved Plasmodium protein	PVX_096255	hypothetical protein	PVX_096260	hypothetical protein	PVX_096265	40S ribosomal protein S5	PVX_096268	conserved Plasmodium membrane protein
Pv_Sal1_chr05	637279	649113	10	PVX_089535	hypothetical protein
Pv_Sal1_chr07	303522	305242	4
Pv_Sal1_chr11	1647542	1834877	2	PVX_113400	glyoxalase I	PVX_113405	hypothetical protein	PVX_113410	hypothetical protein	PVX_113415	50S ribosomal protein L24	PVX_113420	RNA binding protein	PVX_113430	hypothetical protein	PVX_113435	serine	PVX_113440	calcium-binding protein	PVX_113445	cyclin dependent kinase binding protein	PVX_113450	nucleoside diphosphate kinase	PVX_113455	hypothetical protein	PVX_113460	hypothetical protein	PVX_113465	long chain polyunsaturated fatty acid elongation enzyme	PVX_113470	hypothetical protein	PVX_113475	RNA binding protein	PVX_113480	ubiquitin-conjugating enzyme E2 I	PVX_113485	hypothetical protein	PVX_113490	hypothetical protein	PVX_113495	polypyrimidine tract binding protein	PVX_113500	hypothetical protein	PVX_113505	coatomer alpha subunit	PVX_113510	glutaredoxin-like protein	PVX_113515	translation initiation factor IF-2
Pv_Sal1_chr12	2890265	2998885	0	PVX_118605	hypothetical protein	PVX_118610	hypothetical protein	PVX_118615	hypothetical protein	PVX_118620	proteosome subunit alpha type 1	PVX_118625	hypothetical protein	PVX_118630	hypothetical protein	PVX_118635	hypothetical protein	PVX_118640	hypothetical protein	PVX_118645	cytochrome c oxidase assembly protein COX11	PVX_118648	hypothetical protein	PVX_118650	hypothetical protein	PVX_118655	bromodomain protein	PVX_118660	tubulin	PVX_118665	hypothetical protein	PVX_118670	hypothetical protein	PVX_118675	hypothetical protein	PVX_118680	early transcribed membrane protein	PVX_118682	erythrocyte membrane protein 3	PVX_118685	Plasmodium exported protein	PVX_118690	40 kDa heat shock protein	PVX_118695	Pv-fam-d protein
[truncated: 192 more columns]
